# Supplementary material
Source: PubMed Central journal article supplement (PMC3638173)
Supplement: supp_amiajnl-2011-000769_amiajnl-2011-000769-s1.pdf [file supp_amiajnl-2011-000769_amiajnl-2011-000769-s1.pdf]

Table 1. Changes in the U.S. electronic health record market, 2006-2010<sup>1</sup>

| Market measures at the hospital referral region level | 2006          | 2007            | 2008                     | 2009                       | 2010                       | Linear slope                      |
|-------------------------------------------------------|---------------|-----------------|--------------------------|----------------------------|----------------------------|-----------------------------------|
| All hospitals                                         | mean (sd)     | mean (sd)       | mean (sd)                | mean (sd)                  | mean (sd)                  | $\beta$ (95% CI)                  |
| # of vendors                                          | 3.70 (2.00)   | 4.00 (2.10)     | 4.07 (2.10)*             | 4.21 (2.14)**              | 4.22 (2.17)**              | 0.12 (0.10, 0.14) <sup>□</sup>    |
| HHI <sup>2,3</sup>                                    | 41.81 (21.56) | 39.82 (20.67)   | 39.74 (20.65)            | 38.37 (19.86)*             | 38.28 (19.59)*             | -1.02 (-1.30, -0.75) <sup>□</sup> |
| % hospitals using paper                               | 23.06 (21.47) | 15.21 (17.73)** | 12.47 (15.73)**          | 8.28 (13.82)**             | 7.62 (12.68)**             | -3.78 (-4.13, -3.43) <sup>□</sup> |
| Small hospitals ( $\leq 99$ beds)                     |               |                 |                          |                            |                            |                                   |
| # of vendors                                          | 1.96 (1.40)   | 2.16 (1.43)     | 2.25 (1.48)*             | 2.43 (1.58)**              | 2.48 (1.62)**              | 0.13 (0.11, 0.15) <sup>□</sup>    |
| HHI                                                   | 64.29 (29.12) | 62.46 (28.64)   | 62.47 (29.14)            | 59.74 (29.50) <sup>†</sup> | 59.23 (29.39) <sup>†</sup> | -1.94 (-2.40, -1.48) <sup>□</sup> |
| % hospitals using paper                               | 35.25 (33.97) | 26.13 (31.02)** | 22.68 (29.40)**          | 16.97 (26.03)**            | 16.14 (25.38)**            | -4.74 (-5.44, -4.05) <sup>□</sup> |
| Medium hospitals(100-249 beds)                        |               |                 |                          |                            |                            |                                   |
| # of vendors                                          | 2.23 (1.51)   | 2.44 (1.57)     | 2.44 (1.52) <sup>†</sup> | 2.59 (1.53)**              | 2.59 (1.57)**              | 0.09 (0.07, 0.10) <sup>□</sup>    |
| HHI                                                   | 62.05 (29.45) | 58.99 (1.54)    | 58.63 (28.31)            | 56.77 (28.26)*             | 57.15 (28.44)*             | -1.58 (-1.96, -1.21) <sup>□</sup> |
| % hospitals using paper                               | 18.70 (25.57) | 9.62 (18.79)**  | 7.77 (16.63)**           | 3.44 (10.89)**             | 2.98 (9.41)**              | -3.76 (-4.25, -3.28) <sup>□</sup> |
| Large hospitals ( $\geq 250$ beds)                    |               |                 |                          |                            |                            |                                   |
| # of vendors                                          | 2.16 (1.35)   | 2.20 (1.45)     | 2.21 (1.49)              | 2.20 (1.43)                | 2.22 (1.43)                | 0.03 (0.01, 0.04) <sup>□</sup>    |
| HHI                                                   | 65.35 (29.83) | 65.08 (29.88)   | 65.47 (30.18)            | 64.99 (29.75)              | 65.06 (29.63)              | -0.44 (-0.71, -0.18) <sup>□</sup> |
| % hospitals using paper                               | 11.25 (24.45) | 6.28 (19.69)**  | 2.86 (12.89)**           | 0.66 (6.86)**              | 0.68 (6.92)**              | -2.68 (-3.14, -2.21) <sup>□</sup> |

<sup>1</sup>Based on the vendors supplying live and operational, in the process of installation, or under contract centralized data repositories to hospitals.

<sup>2</sup>Herfindahl-Hirschman Index

<sup>3</sup>Paper records were excluded in the HHI calculation.

<sup>†</sup> Statistically significantly different from 2006 (base year) at the 90% level.

\* Statistically significantly different from 2006 (base year) at the 95% level.

\*\* Statistically significantly different from 2006 (base year) at the 99% level.

<sup>□</sup> Statistically significant slope at the 99% level.
