# Supplementary material
Source: PubMed Central journal article supplement (PMC3638173)
Supplement: supp_amiajnl-2011-000769_amiajnl-2011-000769-s2.pdf [file supp_amiajnl-2011-000769_amiajnl-2011-000769-s2.pdf]

## Technical appendix

We tested whether the pace of EHR market changes for small, medium, and large hospitals were statistically different from each other. We estimated random intercept regression models, separately for vendor numbers, HHI and paper record usage, that included a linear trend variable, the interaction of the trend variable, and a dichotomous indicator for medium-sized hospital, and the interaction of the trend variable and a dichotomous indicator for large hospital. Coefficients on the interaction variables served as a test for whether the trends in the number of vendors, competition and paper record usage differ by hospital size.

|                                                                               | # of vendors<br>$\beta$ (p-value) | HHI<br>$\beta$ (p-value) | % paper records<br>$\beta$ (p-value) |
|-------------------------------------------------------------------------------|-----------------------------------|--------------------------|--------------------------------------|
| All hospitals                                                                 | n=3992                            | n=3906                   | n=4047                               |
| Intercept                                                                     | 1.61                              | 71.10                    | 41.36                                |
| Year                                                                          | 0.07 (0.000)                      | -1.00 (0.000)            | -2.33 (0.000)                        |
| Medium size * year                                                            | 0.02 (0.000)                      | -0.35 (0.001)            | -1.75 (0.000)                        |
| Large size * year                                                             | -0.01 (0.023)                     | 0.39 (0.000)             | -2.24 (0.000)                        |
| Test of joint significance<br>Large size * year = 0<br>Medium size * year = 0 | p = 0.000                         | 0.000                    | 0.000                                |

As noted in our manuscript, we measured the market for purchased CDRs and not specifically EHRs. To demonstrate that CDR vendors are representative of EHR vendors, we compared the 10 most common hospital CDR vendors in 2006 to the current ONC certified EHR product listing (according [healthit.hhs.gov](http://healthit.hhs.gov)). This list represents about 88% of all installed systems in the survey for 2006 and each one of these vendors currently has an ONC certified EHR product. As an additional check, the 2008 survey provides the same vendors as well as additional names like Keane, Medsphere, Allscripts, Nextgen, and 3M, which again are current EHR vendors according to ONC.

| 10 most common CDR vendors in 2006  | Vendor has ONC certified EHR product in 2012? |
|-------------------------------------|-----------------------------------------------|
| MEDITECH                            | Yes                                           |
| MCKESSON PROVIDER TECHNOLOGIES      | Yes                                           |
| CERNER CORPORATION                  | Yes                                           |
| SIEMENS MEDICAL SOLUTIONS           | Yes                                           |
| EPIC SYSTEMS CORP.                  | Yes                                           |
| ECLIPSYS CORPORATION                | Yes                                           |
| CPSI                                | Yes                                           |
| GE HEALTHCARE                       | Yes                                           |
| HEALTHCARE MANAGEMENT SYSTEMS, INC. | Yes                                           |
| DAIRYLAND HEALTHCARE SOLUTIONS      | Yes                                           |
| QUADRAMED CORP.                     | Yes                                           |
